# Supplementary material
Source: PubMed Central journal article supplement (PMC3671861)
Supplement: NIHMS463276-supplement-1.pdf [file NIHMS463276-supplement-1.pdf]

**Chest Computed Tomography Features are Associated with Poorer Quality of Life in  
Acute Lung Injury Survivors**

Ellen L. Burnham, MD, MS; Robert C. Hyzy, MD; Robert Paine, III, MD, Curtis Coley, II, MD;  
Aine M. Kelly, MD, MD; Leslie E. Quint, MD; David Lynch, MB; William J. Janssen, MD;  
Marc Moss, MD; and Theodore J. Standiford, MD

**Supplemental Digital Content**

Supplemental  
Figure 1a.

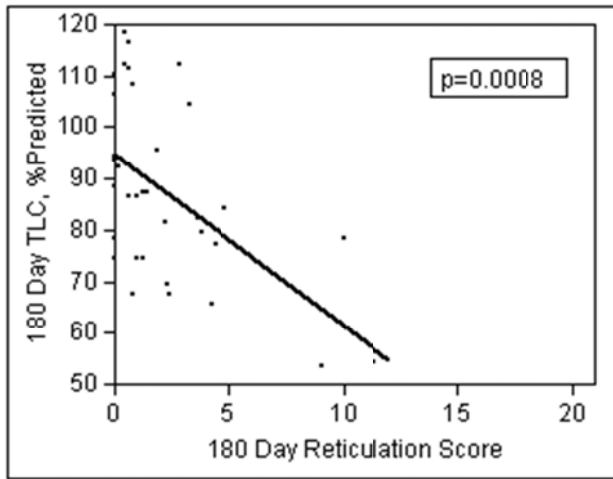

Supplemental  
Figure 1b.

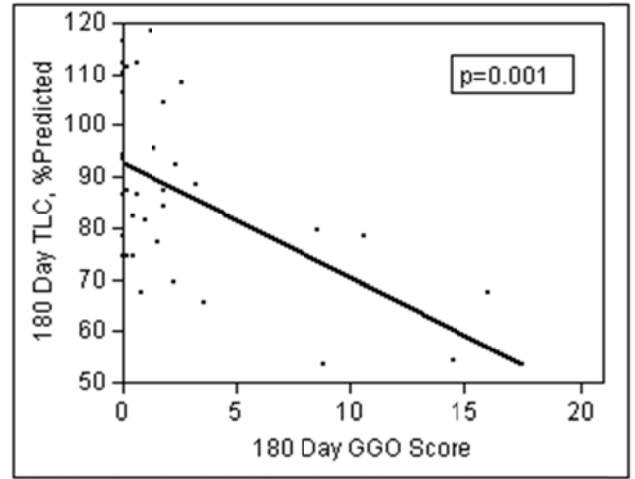

Supplemental  
Figure 1c.

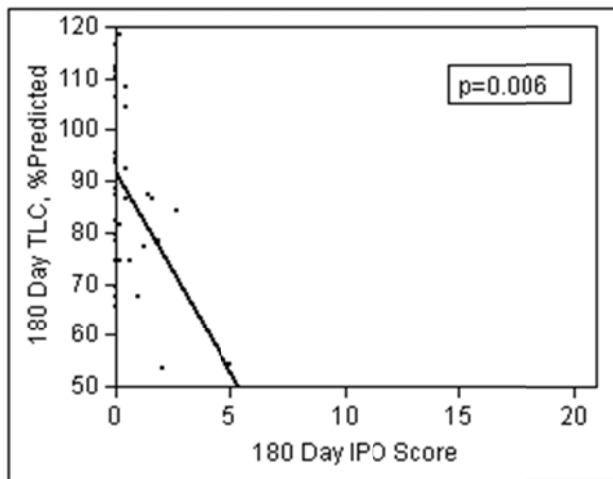

Supplemental  
Figure 1d.

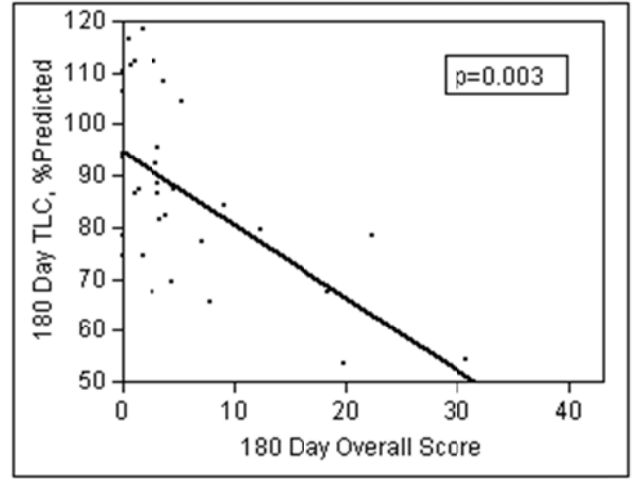

**Supplemental Digital Content-2. Pulmonary function testing compared with health related quality of life at 180 days**

| <b>Pulmonary Function Testing Parameters at <u>180 Days</u> after ALI Diagnosis</b> |                          |                        |          |          |                                  |          |          |                        |          |          |                       |          |          |                            |          |          |                         |          |          |
|-------------------------------------------------------------------------------------|--------------------------|------------------------|----------|----------|----------------------------------|----------|----------|------------------------|----------|----------|-----------------------|----------|----------|----------------------------|----------|----------|-------------------------|----------|----------|
|                                                                                     |                          | <b>FVC, %predicted</b> |          |          | <b>FEV<sub>1</sub>/FVC ratio</b> |          |          | <b>TLC, %predicted</b> |          |          | <b>RV, %predicted</b> |          |          | <b>DLCO/VA, %predicted</b> |          |          | <b>DLCO, %predicted</b> |          |          |
|                                                                                     |                          | <b>R<sup>2</sup></b>   | <b>r</b> | <b>P</b> | <b>R<sup>2</sup></b>             | <b>r</b> | <b>P</b> | <b>R<sup>2</sup></b>   | <b>r</b> | <b>P</b> | <b>R<sup>2</sup></b>  | <b>r</b> | <b>P</b> | <b>R<sup>2</sup></b>       | <b>r</b> | <b>P</b> | <b>R<sup>2</sup></b>    | <b>r</b> | <b>P</b> |
| <b>Short form-36 Survey at <u>180 Days</u></b>                                      | Physical Function        | 0.39                   | 0.6      | <0.0001  | 0.004                            | -0.07    | 0.66     | 0.19                   | 0.4      | 0.004    | 0.01                  | 0.1      | 0.54     | 0.10                       | 0.3      | 0.04     | 0.37                    | 0.6      | 0.0001   |
|                                                                                     | Role Physical            | 0.20                   | 0.4      | 0.002    | 0.01                             | 0.10     | 0.53     | 0.22                   | 0.5      | 0.002    | 0.04                  | 0.2      | 0.20     | 0.04                       | 0.2      | 0.19     | 0.27                    | 0.5      | 0.0003   |
|                                                                                     | Physical Health Subtotal | 0.34                   | 0.6      | <0.0001  | 0.0                              | 0.01     | 0.95     | 0.21                   | 0.5      | 0.003    | 0.02                  | 0.1      | 0.40     | 0.05                       | 0.2      | 0.15     | 0.29                    | 0.5      | 0.0001   |
|                                                                                     |                          |                        |          |          |                                  |          |          |                        |          |          |                       |          |          |                            |          |          |                         |          |          |
| <b>St. George's Respiratory Questionnaire at <u>180 Days</u></b>                    | Symptoms                 | 0.12                   | -0.4     | 0.02     | 0.02                             | 0.1      | 0.38     | 0.12                   | -0.4     | 0.02     | 0.05                  | -0.2     | 0.15     | 0.03                       | 0.2      | 0.26     | 0.02                    | -0.1     | 0.34     |
|                                                                                     | Activity                 | 0.27                   | -0.5     | 0.0002   | 0.01                             | 0.1      | 0.50     | 0.20                   | -0.4     | 0.003    | 0.02                  | -0.1     | 0.40     | 0.01                       | -0.1     | 0.48     | 0.19                    | -0.4     | 0.003    |
|                                                                                     | Impact                   | 0.13                   | -0.4     | 0.01     | 0.03                             | 0.2      | 0.24     | 0.17                   | -0.4     | 0.008    | 0.03                  | -0.2     | 0.28     | 0.003                      | -0.1     | 0.71     | 0.09                    | -0.3     | 0.04     |
|                                                                                     | Total                    | 0.21                   | -0.5     | 0.001    | 0.02                             | 0.2      | 0.32     | 0.21                   | -0.5     | 0.003    | 0.03                  | -0.2     | 0.25     | 0.002                      | -0.05    | 0.75     | 0.13                    | -0.4     | 0.01     |

**Supplemental Digital Content-3.** Relationship between HRCT score at 14 days, inpatient clinical variables, and 180 HRQoL as assessed by either the SF-36 (top table), or SGRQ (bottom table).

N=39 observations

|                                    | SF-36 Physical Health Subtotal<br>R <sup>2</sup> =0.31 |         | SF-36 Physical Health Subtotal<br>R <sup>2</sup> =0.25 |         | SF-36 Physical Health Subtotal<br>R <sup>2</sup> =0.28 |         |
|------------------------------------|--------------------------------------------------------|---------|--------------------------------------------------------|---------|--------------------------------------------------------|---------|
| Variable                           | β±SE                                                   | P value | β±SE                                                   | P value | β±SE                                                   | P value |
| Intercept                          | 64.6±16.4                                              | 0.0004  | 66.2±17.9                                              | 0.0008  | 70.6±17.8                                              | 0.0004  |
| 14 Day HRCT Reticulation score     | -3.3±1.1                                               | 0.005   | --                                                     | --      | --                                                     | --      |
| 14 Day HRCT GGO score              | --                                                     | --      | -2.1±0.8                                               | 0.02    | --                                                     | --      |
| 14 Day HRCT Total score            | --                                                     | --      | --                                                     | --      | -1.1±0.4                                               | 0.007   |
| Age                                | 0.3±0.3                                                | 0.25    | 0.1±0.3                                                | 0.36    | 0.2±0.3                                                | 0.49    |
| APACHE II                          | -0.6±0.5                                               | 0.25    | -0.5±0.6                                               | 0.36    | -0.6±0.6                                               | 0.29    |
| Pneumonia as ALI risk factor [y/n] | -3.3±3.8                                               | 0.38    | -2.5±3.9                                               | 0.51    | -3.5±3.8                                               | 0.36    |
| Ventilator-free days               | -0.01±0.5                                              | 0.98    | 0.4±0.5                                                | 0.36    | 0.1±0.5                                                | 0.83    |

N=37 observations

|                                    | SGRQ Overall Score<br>R <sup>2</sup> =0.32 |         | SGRQ Overall Score<br>R <sup>2</sup> =0.22 |         | SGRQ Overall Score<br>R <sup>2</sup> =0.29 |         |
|------------------------------------|--------------------------------------------|---------|--------------------------------------------|---------|--------------------------------------------|---------|
| Variable                           | β±SE                                       | P value | β±SE                                       | P value | β±SE                                       | P value |
| Intercept                          | 11.8±13.4                                  | 0.39    | 11.6±15.1                                  | 0.45    | 6.1±14.6                                   | 0.68    |
| 14 Day HRCT Reticulation score     | 2.9±0.9                                    | 0.002   | ---                                        | ---     | ---                                        | ---     |
| 14 Day HRCT GGO score              | ---                                        | ---     | 1.7±0.7                                    | 0.02    | ---                                        | ---     |
| 14 Day HRCT Total score            | ---                                        | ---     | ---                                        | ---     | 0.9±0.3                                    | 0.005   |
| Age                                | -0.1±0.2                                   | 0.55    | -0.1±0.2                                   | 0.76    | -0.1±0.2                                   | 0.62    |
| APACHE II                          | 0.3±0.5                                    | 0.50    | 0.4±0.5                                    | 0.39    | 0.5±0.5                                    | 0.31    |
| Pneumonia as ALI risk factor [y/n] | 0.4±3.1                                    | 0.89    | -0.9±3.3                                   | 0.78    | 0.1±3.2                                    | 0.99    |
| Ventilator-free days               | 0.1±0.4                                    | 0.89    | -0.2±0.4                                   | 0.54    | 0.1±0.4                                    | 0.89    |

SF-36=short form-36; SGRQ=St. George's Respiratory Questionnaire; GGO=ground glass opacification
